# Supplementary material for: Local conditions matter: Minimal and variable effects of soil disturbance on microbial communities and functions in European vineyards
Source: PubMed Central journal article supplement (PMC9882891; doi:10.1371/journal.pone.0280516), 2023-01-27
Supplement: pone.0280516.s001.pdf [file pone.0280516.s001.pdf]

## 1 Supporting information

### 3 **Appendix 1** Soil sampling, DNA extraction, sequencing, bioinformatics and 4 sequence preprocessing

5 In each country, soil samples were taken at least one season after experimental plot preparation (2016  
6 and/or 2017) and at minimum 6 weeks after tillage/herbicide application around the time of grapevine  
7 flowering. Eight subsamples were taken in the two central inter-rows of each plot to a depth of 10 cm  
8 approximately 30 – 50 cm apart from each other and were pooled afterwards into one mixed sample,  
9 summing up to a total of 405 soil samples. The number comprises n= 54 samples for Austria 2016,  
10 France 2017, Romania 2017, Germany 2016 and Germany 2017, but n = 77 for Switzerland 2016 and n  
11 = 58 for Switzerland 2017. Thus, we included samples for bacteria and fungi for each country for at  
12 least one season (2016 for Austria, 2017 for France and Romania) or two seasons for Switzerland and  
13 Germany. DNA extraction from each soil sample was either performed directly after soil sampling or  
14 samples were stored frozen at -20° C until extraction. DNA was extracted from 0.25 g of mixed soil  
15 sample per inter-row by using the DNeasyPowerSoil Kit® following the manufacturer's protocol  
16 (QIAGEN N.V., Venlo, Netherlands).

17 DNA sequencing was conducted for the bacterial V4 region of the 16S rDNA using the primers 515f: 5'-  
18 GTGYCAGCMGCCGCGGTAA-3' and 806rB: 5'-GGACTACNVGGGTWTCTAAT-3' (1), and for the fungal  
19 Internal transcribed spacer ITS2 using the primer pair ITS4: 5'-TCCTCCGCTTATTGATATGC-3' and fITS7:  
20 5'-GTGARTCATCGAATCTTTG-3' (2, 3). Sequencing of 250bp paired-end amplicons was conducted on a  
21 MiSeq Illumina machine at Génome Quebec Innovation Centre (Montreal, Canada).

22 Raw Illumina fastq reads were quality controlled with FastQC (4), generally showing good quality. The  
23 reads were cleaned and filtered using sickle (5).

24 For Bacteria, the software package Mothur (version 1.39.5) was used for sequence analysis (6) while  
25 following the Standard Operating Procedure outlined on [http://www.mothur.org/wiki/MiSeq\\_SOP](http://www.mothur.org/wiki/MiSeq_SOP).

26 Briefly, the two overlapping paired-end reads were combined using make.contig. Then, each unique  
27 sequence was aligned with align.seqs to the SILVA reference alignment release 132 (7). A distance  
28 matrix was calculated allowing for four mismatches. Chimeric sequences were identified using  
29 chimera.uchime and removed. Sequences matching “Chloroplast-Mitochondria-unknown-Archaea-  
30 Eukaryota” were also removed. Next, sequences were clustered using the optclust clustering  
31 algorithm (8) to build operational taxonomic units (OTUs). The resulting file was parsed to separate  
32 the data for each sample. OTUs were assigned a taxonomic group with classify.seqs using the RDP  
33 reference file release 11 (9) and a cut-off of 80% of the bootstrap value. For the description of the  
34 community, the sequences are split at the order level and OTUs with the same taxonomy were  
35 clustered together at cut-off level 0.03. Mothur was used to convert data into biom format files.

36 Sequence analysis for fungi was conducted using the software package PIPITS (version 1.3.x, (10)). This  
37 was necessary because Mothur relies on alignment of all sequences which is not possible for fungi.  
38 PIPITS generates a biom file for OTU with the UNITE fungal ITS reference set based on the RDP classifier  
39 (11).

40 Downstream sequence preprocessing was done in R version 3.4.2 (12) with the package phyloseq (13).  
41 Unassignable sequences not belonging to the kingdom of bacteria or fungi were removed. OTU tables  
42 were rarefied (set.seed(631)) and low abundances (< 0.1%) removed. DNA samples with number of  
43 sequences lower than 50 % of the mean number of sequences of all samples per country were removed  
44 from the analysis (bacteria: n = 6; fungi: n = 4).

## 45 [Appendix 2: Microbial taxa responding to different disturbance levels](#)

46

### 47 [Methods](#)

48 To evaluate which microbial taxa were associated with different disturbance levels, we used the  
49 Indicator Value approach on the bacterial and fungal abundance data sets at the European level and  
50 for each country (14). The approach allows to identify taxa with a preference or sensitivity to a certain  
51 disturbance level. The Indicator Value shows associations of taxa with samples belonging to certain

52 target groups (in our case different disturbance levels) by calculation of specificity, which signifies the  
53 probability of the site belonging to the target group, given that the taxon has been at that site, and  
54 sensitivity, which signifies the probability of a taxon occurring at a site of the target group. We conduct  
55 the Indicator Value analysis using the multipatt function of the indicpecies package (14). We tested  
56 all soil disturbance levels as target groups including their combinations and applied permutation tests  
57 (n = 10000) using 'vineyard' as block variable to test for significance of associations between taxa and  
58 groups. We only reported taxa with Indicator Values > 0.6 and p < 0.05.

59

## 60 Results

61 Using the Indicator Value approach, we identified two bacterial genera but no fungi that were  
62 associated with soil disturbance at the European level (Table S9). The bacterial genera *Hymenobacter*  
63 and *Pontibacter* were identified as indicator taxa for the combined disturbance levels 'intermediate +  
64 high', suggesting that these genera were less abundant in soils of low disturbance.

65

66 At the level of countries, we found various taxa associated with different disturbance levels (Table S9).  
67 Here, we only report taxa that show a consistent pattern in more than one country . Four bacterial  
68 taxa and three fungal taxa were assigned as indicators for disturbance levels in more than one country,  
69 however, no taxon was found that was assigned as indicator in all countries. The bacterial genus  
70 *Dyadobacter* was associated with the combined disturbance level 'low + intermediate' in Austria and  
71 Switzerland, indicating that *Dyadobacter* were sensitive too high disturbance. The bacterial genera  
72 *Hymenobacter*, *Pontibacter* (in accordance with the European level) and the assemblage of unclassified  
73 members of the phylum *Armatimonadetes* were identified as indicators for the combined disturbance  
74 level 'intermediate + high' in Austria, Germany, and France.

75

76 The fungal family *Glomeraceae* was identified as indicator taxon for the combined disturbance level  
77 'low + intermediate' in Austria and Germany suggestion susceptibility of this family to high disturbance.

78 The species *Sarocladium strictum* was associated with disturbance level 'low + intermediate' in  
79 Germany and France. The species *Spizellomyces dolichospermus* was an indicator for the combined soil  
80 disturbance 'intermediate + high' for Germany and France.

81

## 82 Discussion

83 The Indicator Value approach evaluates the predictive power of taxa for different habitats (in our case  
84 soil disturbance levels). The approach is suitable to find taxa that show contrasting patterns between  
85 different habitats rather than identifying small changes of taxa abundances (14). At the level of  
86 individual countries, we identified several taxa with a prediction power for different disturbance levels.  
87 This shows that the changes in community composition indicated by PERMANOVA was accompanied  
88 by strong changes of abundances of individual taxa.

89 However, we only found 4 bacterial and 3 fungal taxa that were identified as indicators for different  
90 disturbance levels in more than one country. This is a low number, given that we found a total number  
91 of 504 bacterial and 916 fungal taxa across all countries. This corroborates our conclusion that  
92 responses of microbial communities in one region cannot be simply extrapolated to other regions  
93 because of different local community composition and environmental conditions.

94 The bacterial genus *Dyadobacter* was identified as indicator for low and intermediate disturbance, i.e.,  
95 it is rare in highly disturbed soils. The genera *Pontibacter* and *Hymenobacter* as well as the group of  
96 unclassified *Armatimonadetes* were associated with samples under intermediate to high soil  
97 disturbance. The functions of these bacteria, commonly found in soil, are largely unknown. However,  
98 the phylum *Armatimonadetes* has previously been found to be positively correlated with tilled soils  
99 and negatively with cover crops in Californian vineyards (15).

100 The fungal family *Glomeraceae*, whose members are known to interact with plant roots forming  
101 arbuscular mycorrhiza, was associated with low to intermediate disturbed soils. It is known that  
102 arbuscular mycorrhizal fungi are susceptible to tillage because of disruption of mycelial networks (16).

103 Similarly, the application of Glyphosate caused a decline of arbuscular mycorrhizal fungi in green house  
104 experiments (17). Grapevines also benefit from mycorrhizal symbiosis (16), thus, supporting  
105 Glomeromycotan diversity by reducing soil disturbance practices might be beneficial for grapevine  
106 growth.

107 The fungal species *Sarocladium strictum* and *Spizellomyces dolichospermus* were also identified as  
108 indicator species. While *S. dolichospermus* indicated intermediate to highly disturbed soils, *S. strictum*,  
109 which is known as a plant pathogen in many crops (18), was associated with low to intermediate  
110 disturbed soils.

111

### 112 [Appendix 3 Relative abundances of taxa](#)

113 The most abundant bacterial phyla (> 1% total relative abundance) were *Acidobacteria* (~30%),  
114 *Proteobacteria* (~21%), *Actinobacteria* (~14%), *Planctomycetes* (~5%), *Bacteroidetes* (~4%),  
115 *Verrucomicrobia* (~3.5%), *Chloroflexi* (~1.5%), *Gemmatimonadetes* (~1.3%) and unclassified *bacteria*  
116 (~17%).

117 The most abundant fungal orders (> 1% total relative abundance) were *Hypocreales* (~18%),  
118 *Pleosporales* (~11%), *Sordariomycetes* (~9%), *Helotiales*(~5.1%), *Dothideomycetes* (~4%), *Xylariales*  
119 (~3.3%), *Mortierellales* (~4.4%), *Tremellales* (~3.2%), *Sordariales* (~3.2%), *Agaricales* (~2%),  
120 *Capnodiales* (~1.8), *Chaetothyriales* (~1.5%), *Pezizales* (~1.3%). Sequences not assignable to order  
121 level, like *Ascomycota* (~11%) and 'unclassified fungi' (~13%) did also contribute to a relevant extent  
122 to fungal community composition.

123

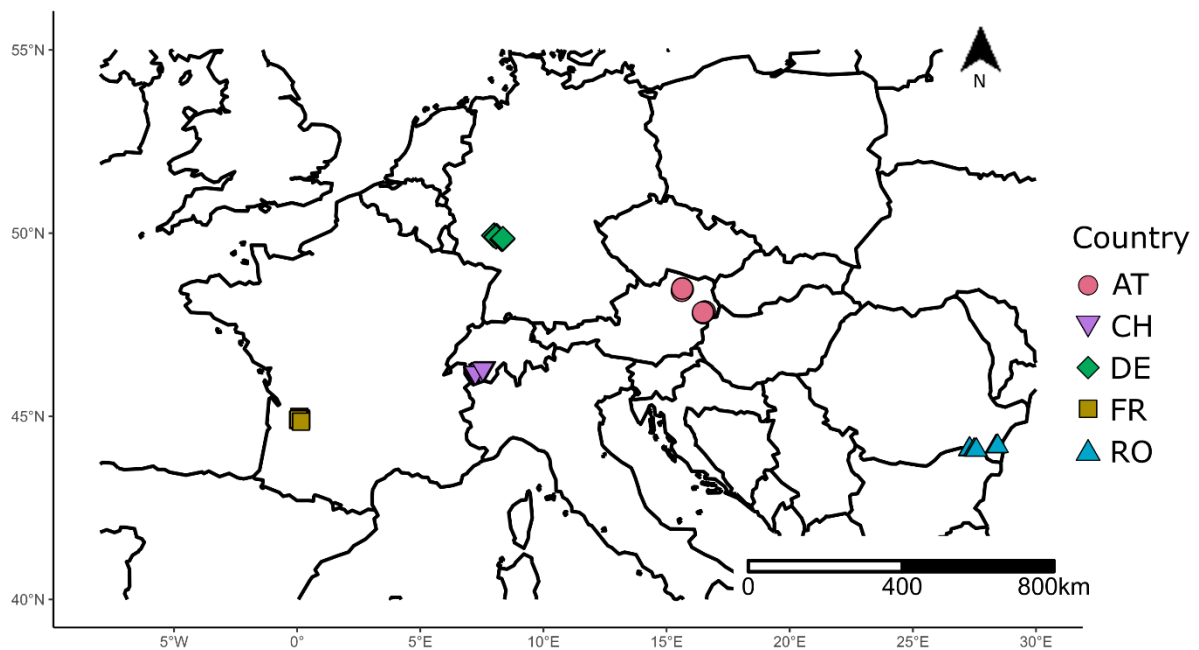

125

126 Fig. S1 Map showing localities of vineyards in vine-growing regions of five different countries (red  
127 circle: AT, Austria (Kamptal, Kremstal, Leithaberg); purple inverse triangle: CH, Switzerland (Valais);  
128 green diamond: DE, Germany (Rheinhessen); ocher square: FR, France Bordeaux, Libournais; blue  
129 triangle: RO, Romania (Dobrogea))

130

131

132

133 **Supplementary tables**

134 Table S1 Details of vineyards used for the study.

135 Table S2 Implementation of vineyard soil disturbance levels “low”, “intermediate”, “high” in the  
136 countries involved in the study.

137 Table S3 Ranges, mean values and standard deviations of soil covariates.

138 Table S4 Summary of general linear mixed model fit by maximum likelihood for each soil covariate.

139 Table S5 Summary of coefficients from linear mixed effect model fitted by maximum likelihood for  
140 bacterial OTU richness.

141 Table S6 Summary of coefficients from linear mixed effect model fitted by maximum likelihood for  
142 bacterial OTU Shannon Index.

143 Table S7 Summary of coefficients from linear mixed effect model fitted by maximum likelihood for  
144 fungal richness fungal OTU richness.

145 Table S8 Summary of coefficients from linear mixed effect model fitted by maximum likelihood for  
146 fungal fungal OTU Shannon Index.

147 Table S9 Results of Indicator species analysis of bacterial and fungal communities at European and  
148 country level.

149 Table S10 Coefficients from linear mixed effect model fitted by maximum likelihood for microbial  
150 respiration.

151 Table S11 Summary coefficients from linear mixed effect model fitted by maximum likelihood for  
152 decomposition of labile substrate.

153 Table S12 Summary coefficients from linear mixed effect model fitted by maximum likelihood for  
154 decomposition of recalcitrant substrate.

155 Table S13 ANOVA table of db-RDA results (a) and variance inflation factors (VIF, b) at the European and  
156 country scale. Table S14: Variance partitioning for soil bacterial and fungal communities based on db-  
157 RDA.

158

**Table S1**

Details of vineyards used for the study. Countries: AT, Austria; CH, Switzerland; DE, Germany; FR, France; RO, Romania; initial state of inter-row treatment before installation of experimental plots: ah, alternating herbicide, at, alternating tillage; cc, complete cover; ti, complete tillage; ch, complete herbicide. Details regarding inter-row treatments are given in Table S2.

| country | ID               | latitude   | longitude  | variety             | year of planting | initial state of inter-row treatment |    |
|---------|------------------|------------|------------|---------------------|------------------|--------------------------------------|----|
| AT      | AT1              | 48.4664 °N | 15.6612 °E | Pinot Noir          | 2008             | at                                   |    |
|         | AT2              | 48.4212 °N | 15.6163 °E | Riesling            | 2007             | at                                   |    |
|         | AT3              | 47.8139 °N | 16.4707 °E | Zweigelt            | 1988             | at                                   |    |
|         | AT4              | 47.8621 °N | 16.5530 °E | Merlot              | 2002             | at                                   |    |
|         | AT5              | 47.8393 °N | 16.4901 °E | Carbarnet Sauvignon | 2001             | at                                   |    |
|         | AT6              | 47.8399 °N | 16.4747 °E | Pinot Noir          | 2008             | at                                   |    |
|         | AT7 <sup>1</sup> | 48.4933 °N | 15.6448 °E | Green Veltliner     | 1995             | at                                   |    |
|         | AT8 <sup>1</sup> | 48.4954 °N | 15.6348 °E | Green Veltliner     | 2000             | at                                   |    |
|         | AT9 <sup>1</sup> | 48.4849 °N | 15.6337 °E | Green Veltliner     | 2003             | at                                   |    |
| CH      | CH3              | 46.3201 °N | 7.6170 °E  | Pinot noir          | 1984             | cc                                   |    |
|         | CH4              | 46.3192 °N | 7.6185 °E  | Pinot noir          | 1984             | ch                                   |    |
|         | CH6              | 46.2943 °N | 7.5401 °E  | Pinot noir          | 2002             | cc                                   |    |
|         | CH7              | 46.2790 °N | 7.4855 °E  | Pinot noir          | 2005             | cc                                   |    |
|         | CH8              | 46.2788 °N | 7.4856 °E  | Pinot noir          | 1986             | ch                                   |    |
|         | CH9              | 46.2714 °N | 7.4689 °E  | Chasselas           | 2008             | cc                                   |    |
|         | CH10             | 46.2715 °N | 7.4695 °E  | Chasselas           | 1982             | ch                                   |    |
|         | CH11             | 46.1732 °N | 7.1782 °E  | Chasselas           | 1974             | cc                                   |    |
|         | CH12             | 46.1736 °N | 7.1802 °E  | Chasselas           | 1980             | ch                                   |    |
|         | CH13             | 46.1733 °N | 7.1821 °E  | Chasselas           | 1996             | ah                                   |    |
|         | CH14             | 46.2873 °N | 7.5132 °E  | Chasselas           | 2000             | ah                                   |    |
|         | CH15             | 46.2956 °N | 7.5293 °E  | Chasselas           | 1991             | cc                                   |    |
|         | CH16             | 46.2959 °N | 7.5299 °E  | Chasselas           | 1956             | ch                                   |    |
|         | CH17             | 46.2620 °N | 7.5077 °E  | Chasselas           | 2000             | ah                                   |    |
|         | CH18             | 46.2613 °N | 7.5058 °E  | Pinot noir          | 2000             | ah                                   |    |
|         | CH19             | 46.2995 °N | 7.5224 °E  | Pinot noir          | 1976             | cc                                   |    |
|         |                  | CH20       | 46.2976 °N | 7.5173 °E           | Pinot noir       | 2006                                 | ah |
|         |                  | CH21       | 46.2974 °N | 7.5157 °E           | Pinot noir       | 2004                                 | ch |
|         |                  | CH22       | 46.2853 °N | 7.5151 °E           | Pinot noir       | 1986                                 | ch |
|         | CH               | CH23       | 46.2537 °N | 7.4019 °E           | Chasselas        | 2003                                 | cc |
| CH24    |                  | 46.2536 °N | 7.4048 °E  | Chasselas           | 2006             | ah                                   |    |
| CH25    |                  | 46.2534 °N | 7.4047 °E  | Chasselas           | 1984             | ch                                   |    |
| CH26    |                  | 46.1913 °N | 7.2296 °E  | Chasselas           | 1990             | ch                                   |    |
| CH27    |                  | 46.1894 °N | 7.2303 °E  | Chasselas           | 1980             | cc                                   |    |
| CH28    |                  | 46.1942 °N | 7.2314 °E  | Pinot noir          | 1995             | ah                                   |    |
| CH30    |                  | 46.2529 °N | 7.4694 °E  | Pinot noir          | 1985             | cc                                   |    |
| CH31    |                  | 46.2528 °N | 7.4683 °E  | Pinot noir          | 1985             | ch                                   |    |
| CH32    |                  | 46.1942 °N | 7.2314 °E  | Chasselas           | 1987             | ah                                   |    |
| CH33    |                  | 46.2950 °N | 7.5409 °E  | Pinot noir          | 2008             | ah                                   |    |
| DE      |                  | DE1        | 49.9455 °N | 7.9949 °E           | Pinot noir       | 2002                                 | cc |
|         | DE2              | 49.9467 °N | 8.0130 °E  | Dakapo              | 2002             | cc                                   |    |
|         | DE3              | 49.9349 °N | 7.9730 °E  | Pinot noir          | 2001             | cc                                   |    |



| country | ID               | latitude   | longitude  | variety                          | year of planting | initial state<br>of inter-row<br>treatment |
|---------|------------------|------------|------------|----------------------------------|------------------|--------------------------------------------|
|         | DE4              | 49.9254 °N | 8.1146 °E  | Mueller-<br>Thurgau              | 1987             | cc                                         |
|         | DE5              | 49.9284 °N | 8.1031 °E  | Pinot blanc                      | 2007             | cc                                         |
|         | DE6              | 49.8929 °N | 8.0765 °E  | Silvaner                         | 1988             | cc                                         |
|         | DE7              | 49.8212 °N | 8.3080 °E  | Dornfelder                       | 1994             | cc                                         |
|         | DE8              | 49.8320 °N | 8.3486 °E  | Riesling                         | 1994             | cc                                         |
|         | DE9              | 49.8550 °N | 8.3545 °E  | Not the same<br>across all plots | 1992             | cc                                         |
| FR      | FR1              | 44.9484 °N | 0.1439 °W  | Merlot                           | 1985             | cc                                         |
|         | FR2              | 44.9885 °N | 0.0920 °W  | Merlot                           | 1995             | cc                                         |
|         | FR3              | 44.9291 °N | 0.1641 °W  | Merlot                           | 2007             | cc                                         |
|         | FR4              | 44.9471 °N | 0.1306 °W  | Merlot                           | 2000             | cc                                         |
|         | FR5 <sup>1</sup> | 44.8985 °N | 0.1745 °W  | Merlot                           | 2000             | cc                                         |
|         | FR6              | 44.8986 °N | 0.0332 °W  | Merlot                           | 1981             | cc                                         |
|         | FR7              | 44.8580 °N | 0.1360 °W  | Merlot                           | 1971             | cc                                         |
|         | FR8              | 44.9236 °N | 0.0521 °W  | Merlot                           | 1983             | cc                                         |
|         | FR9              | 44.8551 °N | 0.1582 °W  | Merlot                           | 2000             | cc                                         |
| RO      | RO1              | 44.1724 °N | 28.3716 °E | Sauvignon blanc                  | 2008             | ti                                         |
|         | RO2              | 44.1759 °N | 28.4215 °E | Sauvignon blanc                  | 2009             | ti                                         |
|         | RO3              | 44.1814 °N | 28.4419 °E | Tămâioasă<br>românească          | 2009             | ti                                         |
|         | RO4              | 44.0922 °N | 27.2984 °E | Cabernet franc                   | 2008             | cc                                         |
|         | RO5              | 44.0943 °N | 27.2813 °E | Cabernet franc                   | 2007             | cc                                         |
| RO      | RO6              | 44.1080 °N | 27.3047 °E | Cabernet franc                   | 2006             | cc                                         |
|         | RO7              | 44.0806 °N | 27.4869 °E | Riesling                         | 2009             | cc                                         |
|         | RO8              | 44.0799 °N | 27.5572 °E | Riesling                         | 2006             | cc                                         |
|         | RO9              | 44.0807 °N | 27.5743 °E | Riesling                         | 2008             | cc                                         |

Remarks

<sup>1</sup> Vineyards were organically managed

**Table S2**

Implementation of vineyard soil disturbance levels “low”, “intermediate”, “high” in the countries involved in the study (AT, Austria; CH, Switzerland; DE, Germany; FR, France; RO, Romania). Denomination, in italics, and description of soil treatments are given.

| soil disturbance | AT                                                                                                                                                                                                                                                                                                                     | DE | FR                                                                                                                                                                                                                                                        | RO                                                                                                                                                                                                     | CH                                                                                                                                                                                                                                                                         |
|------------------|------------------------------------------------------------------------------------------------------------------------------------------------------------------------------------------------------------------------------------------------------------------------------------------------------------------------|----|-----------------------------------------------------------------------------------------------------------------------------------------------------------------------------------------------------------------------------------------------------------|--------------------------------------------------------------------------------------------------------------------------------------------------------------------------------------------------------|----------------------------------------------------------------------------------------------------------------------------------------------------------------------------------------------------------------------------------------------------------------------------|
| low              | <i>complete cover</i> :<br>inter-row vegetation mulched several times per season on demand                                                                                                                                                                                                                             |    |                                                                                                                                                                                                                                                           |                                                                                                                                                                                                        |                                                                                                                                                                                                                                                                            |
| intermediate     | <i>alternating tillage</i> :<br>Every second inter-row received only mulching (as in <i>complete cover</i> ), while the others were treated by mechanical disturbance of the upper soil layer (0-10cm). Tillage was applied 2 – 3 times per season (depending on the region); the inter-rows were switched each season |    | <i>green manure</i> <sub>1</sub> :<br>After grape harvest (beginning of October) vegetation was removed in each inter-row and a winter-crop ( <i>rye-vetch mixture</i> ) was sown. In spring, the winter crop was incorporated into the soil by ploughing | <i>green manure</i> <sub>2</sub> :<br>Alfalfa ( <i>Medicago sativa</i> ) was sown in spring, mowed several times over the year as needed and incorporated in the soil in late winter, resown in spring | <i>alternating herbicide</i> :<br>Every second inter-row received only mulching (as in <i>complete cover</i> ), while the others were treated by herbicides (Glyphosate, Glufosinat, Dichlobenil) to remove vegetation; treatment of inter-rows were the same each season. |
| high             | <i>complete tillage</i> :<br>In all inter-rows, the upper soil (approx. 0-10cm) was mechanically disturbed. Treatment was applied 2 – 4 times per season (depending on the region)                                                                                                                                     |    |                                                                                                                                                                                                                                                           |                                                                                                                                                                                                        | <i>complete herbicide</i> :<br>In all inter-rows, vegetation was removed by herbicide (Glyphosate, Glufosinat, Dichlobenil) application with 1 – 4 applications per growing season starting in April                                                                       |

**Table S3**

Range, mean values and standard deviation for the included soil parameter covariates (OC [%] = organic carbon; C/N ratio = carbon/nitrogen ratio; Cu [mg/kg] = bioavailable soil copper content; pH = soil pH; clay = clay content in %) at the different disturbance levels (1 = low; 2 = intermediate, 3 = high) in each country (AT, Austria; CH, Switzerland; DE, Germany; FR, France; RO, Romania).

| Soil parameters | Country | Range |       | Disturbance |       |        |        |       |       |
|-----------------|---------|-------|-------|-------------|-------|--------|--------|-------|-------|
|                 |         |       |       | 1           |       | 2      |        | 3     |       |
|                 |         |       |       | min         | max   | mean   | sd     | mean  | sd    |
| OC [%]          | AT      | 1.69  | 7.97  | 3.83        | 1.64  | 3.53   | 1.53   | 3.43  | 1.60  |
|                 | CH      | 0.95  | 14.74 | 4.57        | 2.36  | 4.97   | 3.04   | 4.04  | 2.27  |
|                 | DE      | 1.53  | 3.92  | 2.52        | 0.52  | 2.43   | 0.43   | 2.41  | 0.47  |
|                 | FR      | 0.75  | 5.91  | 1.89        | 1.10  | 1.57   | 0.78   | 1.68  | 1.18  |
|                 | RO      | 1.29  | 2.23  | 1.81        | 0.26  | 1.78   | 0.18   | 1.82  | 0.23  |
| C/N ratio       | AT      | 10.3  | 43.7  | 20.02       | 8.41  | 19.21  | 7.35   | 22.07 | 11.28 |
|                 | CH      | 3.6   | 44    | 11.81       | 3.10  | 13.55  | 4.52   | 13.66 | 6.38  |
|                 | DE      | 9.9   | 18.4  | 14.06       | 2.41  | 13.34  | 2.02   | 13.26 | 2.13  |
|                 | FR      | 4.9   | 17.4  | 11.57       | 1.55  | 11.12  | 2.01   | 10.62 | 2.65  |
|                 | RO      | 10.2  | 15.3  | 11.76       | 0.68  | 11.75  | 1.38   | 11.80 | 0.88  |
| Cu [mg/kg]      | AT      | 1.5   | 106.1 | 35.96       | 30.65 | 29.31  | 25.60  | 29.29 | 25.47 |
|                 | CH      | 15    | 520.1 | 79.40       | 69.75 | 169.25 | 172.68 | 97.32 | 67.82 |
|                 | DE      | 4.1   | 42.9  | 24.41       | 13.26 | 20.19  | 10.66  | 19.58 | 10.00 |
|                 | FR      | 1.3   | 223.3 | 54.04       | 48.36 | 65.56  | 57.34  | 54.52 | 42.56 |
|                 | RO      | 3.6   | 53.4  | 17.56       | 13.81 | 16.06  | 12.89  | 17.60 | 10.56 |
| pH              | AT      | 6.7   | 7.6   | 7.28        | 0.26  | 7.31   | 0.29   | 7.32  | 0.25  |
|                 | CH      | 5.1   | 7.7   | 7.25        | 0.21  | 7.12   | 0.25   | 7.11  | 0.65  |
|                 | DE      | 7.1   | 7.6   | 7.39        | 0.08  | 7.39   | 0.12   | 7.38  | 0.11  |
|                 | FR      | 5.5   | 7.4   | 6.38        | 0.68  | 6.48   | 0.62   | 6.51  | 0.61  |
|                 | RO      | 6     | 7.6   | 7.17        | 0.55  | 7.23   | 0.44   | 7.20  | 0.49  |
| Clay %          | AT      | 6     | 32    | 16.83       | 7.41  | 17.22  | 7.90   | 18.06 | 6.95  |
|                 | CH      | 4     | 18    | 9.10        | 3.96  | 8.48   | 3.17   | 11.33 | 3.90  |
|                 | DE      | 0     | 37    | 17.78       | 9.04  | 15.78  | 6.43   | 14.44 | 5.94  |
|                 | FR      | 4     | 22    | 10.33       | 6.23  | 11.22  | 3.90   | 11.89 | 5.30  |
|                 | RO      | 14    | 26    | 21.44       | 3.91  | 21.33  | 4.28   | 21.78 | 3.72  |

**Table S4**

Summary of general linear mixed model fit by maximum likelihood for the response of each soil covariate (OC [%] = organic carbon; C/N ratio = carbon/nitrogen ratio; Cu [mg/kg] = bioavailable soil copper content; pH = soil pH; clay = clay content in %) to the disturbance gradient (low = 1; intermediate = 2; high = 3). t-tests used Satterthwaite's method ['lmerModLmerTest'].

| Response variable | Explanatory variable  | Estimate | Std. Error | df      | t value | Pr(> t ) |
|-------------------|-----------------------|----------|------------|---------|---------|----------|
| OC %              |                       | -0.046   | 0.03       | 187.996 | -1.541  | 0.125    |
| C/N ratio         | ~ disturbance (1 - 3) | 0.005    | 0.021      | 186     | 0.218   | 0.828    |
| Cu [mg/kg]        |                       | -0.004   | 0.091      | 132.017 | -0.043  | 0.966    |
| pH                |                       | -0.008   | 0.034      | 186.074 | -0.242  | 0.809    |
| clay %            |                       | 0.207    | 0.602      | 132.006 | 0.343   | 0.732    |

**Table S5**

Summary of coefficients from linear mixed effect model fitted by maximum likelihood for bacterial OTU richness. Plot within vineyard was included in the models as nested random factor (1|vineyard/ plot/year) and country (AT, Austria; CH, Switzerland; DE, Germany; FR, France; RO, Romania) was included as interaction term for all analyses. The symbol ":" in the fixed factor column, indicates the interaction of the fixed factor with the country. (Significances were obtained by t-tests using Satterthwaite's method; '\*\*\*' significant at  $p < 0.001$ ; '\*\*' significant at  $p < 0.01$ ; '\*' significant at  $p < 0.05$ ; '.' significant at  $p < 0.1$ )

| fixed factor            | Estimate | Std. Error | df     | t value | Pr(> t ) | sig |
|-------------------------|----------|------------|--------|---------|----------|-----|
| (Intercept)             | 2023.66  | 116.12     | 259.64 | 17.43   | 0        | *** |
| disturbance             | 15.19    | 52.53      | 254.61 | 0.29    | 0.773    |     |
| Cu                      | 33.32    | 40.78      | 368.54 | 0.82    | 0.414    |     |
| C org                   | -159.5   | 64.76      | 356.34 | -2.46   | 0.014    | *   |
| C/N                     | 29.08    | 44.61      | 352.54 | 0.65    | 0.515    |     |
| pH                      | -40.84   | 106.73     | 340.21 | -0.38   | 0.702    |     |
| clay                    | 57.92    | 42.6       | 358.37 | 1.36    | 0.175    |     |
| countryFR               | -937.98  | 141.53     | 346.82 | -6.63   | 0        | *** |
| countryDE               | -119.28  | 123.7      | 342.99 | -0.96   | 0.336    |     |
| countryRO               | -871.28  | 198.48     | 323.22 | -4.39   | 0        | *** |
| countryCH               | -337.11  | 129.5      | 381.74 | -2.6    | 0.01     | **  |
| disturbance : countryFR | 77.95    | 61.89      | 346.98 | 1.26    | 0.209    |     |
| disturbance : countryDE | 18.35    | 45.58      | 306.69 | 0.4     | 0.688    |     |
| disturbance : countryRO | -1.34    | 60.27      | 350.43 | -0.02   | 0.982    |     |
| disturbance : countryCH | -4.74    | 55.92      | 397.76 | -0.08   | 0.933    |     |
| Cu : countryFR          | -91.68   | 58.26      | 346.06 | -1.57   | 0.116    |     |
| Cu : countryDE          | -141.77  | 63.79      | 389.5  | -2.22   | 0.027    | *   |
| Cu : countryRO          | -66.4    | 76.12      | 330.71 | -0.87   | 0.384    |     |
| Cu : countryCH          | -68.12   | 58.13      | 382.28 | -1.17   | 0.242    |     |
| C org : countryFR       | 233.68   | 91.47      | 325.39 | 2.55    | 0.011    | *   |
| C org : countryDE       | 216.9    | 102        | 351.25 | 2.13    | 0.034    | *   |
| C org : countryRO       | 432.39   | 152.94     | 334.55 | 2.83    | 0.005    | **  |
| C org : countryCH       | 261.06   | 73.21      | 376.48 | 3.57    | 0        | *** |
| C/N : countryFR         | -62.98   | 67.55      | 326.14 | -0.93   | 0.352    |     |
| C/N : countryDE         | 47.81    | 68.49      | 366.35 | 0.7     | 0.486    |     |
| C/N : countryRO         | -260.3   | 157.88     | 327.72 | -1.65   | 0.1      |     |
| C/N : countryCH         | -104.64  | 53.8       | 368.05 | -1.94   | 0.053    | .   |
| pH : countryFR          | -21.39   | 112.05     | 347.79 | -0.19   | 0.849    |     |
| pH : countryDE          | 190.63   | 158.92     | 345.02 | 1.2     | 0.231    |     |
| pH : countryRO          | 91.46    | 114.54     | 335.69 | 0.8     | 0.425    |     |
| pH : countryCH          | 96.32    | 115.08     | 385.43 | 0.84    | 0.403    |     |
| clay : countryFR        | -134.41  | 79.01      | 346.46 | -1.7    | 0.09     | .   |
| clay : countryDE        | -63.71   | 51.59      | 363.96 | -1.23   | 0.218    |     |
| clay : countryRO        | 96.55    | 86.25      | 344.44 | 1.12    | 0.264    |     |
| clay : countryCH        | -108.46  | 72.85      | 346.91 | -1.49   | 0.137    |     |

**Table S6**

Summary coefficients from linear mixed effect model fitted by maximum likelihood for bacterial OTU shannon index. Plot within vineyard was included in the models as nested random factor (1|vineyard/plot/year) and country (AT, Austria; CH, Switzerland; DE, Germany; FR, France; RO, Romania) was included as interaction term for all analyses. The symbol ":" in the fixed factor column, indicates the interaction of the fixed factor with the country. (Significances were obtained by t-tests using Satterthwaite's method; '\*\*\*' significant at  $p < 0.001$ ; '\*\*' significant at  $p < 0.01$ ; '\*' significant at  $p < 0.05$ ; '.' significant at  $p < 0.1$ )

| Fixed Factor            | Estimate | Std. Error | df       | t value  | Pr(> t ) | sig |
|-------------------------|----------|------------|----------|----------|----------|-----|
| (Intercept)             | 6.316116 | 0.069146   | 264.1551 | 91.3442  | <0.001   | *** |
| disturbance             | 0.023887 | 0.030576   | 215.8338 | 0.781218 | 0.436    |     |
| Cu                      | 0.048545 | 0.026807   | 381.5011 | 1.810866 | 0.071    |     |
| OC                      | -0.09759 | 0.043048   | 354.9685 | -2.26706 | 0.024    | *   |
| C/N                     | 0.013541 | 0.029605   | 365.9419 | 0.457403 | 0.648    |     |
| pH                      | -0.07909 | 0.071257   | 349.9693 | -1.10995 | 0.268    |     |
| clay                    | 0.027148 | 0.028259   | 362.8586 | 0.960711 | 0.337    |     |
| CountryFR               | -0.2996  | 0.092634   | 381.3007 | -3.23427 | <0.001   | *** |
| CountryDE               | 0.209274 | 0.082128   | 362.5173 | 2.548155 | 0.011    | *   |
| CountryRO               | -0.12271 | 0.131826   | 356.5133 | -0.93084 | 0.353    |     |
| CountryCH               | 0.11595  | 0.084331   | 382.2085 | 1.37495  | 0.170    |     |
| disturbance : CountryFR | 0.044835 | 0.040355   | 374.5771 | 1.111026 | 0.267    |     |
| disturbance : CountryDE | -0.01487 | 0.030514   | 320.4614 | -0.48728 | 0.626    |     |
| disturbance : CountryRO | -0.01668 | 0.039214   | 375.621  | -0.42526 | 0.671    |     |
| disturbance : CountryCH | -0.00917 | 0.035709   | 379.3453 | -0.25678 | 0.797    |     |
| Cu : CountryFR          | -0.07089 | 0.038818   | 354.3887 | -1.82631 | 0.069    | .   |
| Cu : CountryDE          | -0.11761 | 0.042234   | 284.7759 | -2.78475 | 0.006    | **  |
| Cu : CountryRO          | -0.08108 | 0.050733   | 355.8854 | -1.59822 | 0.111    |     |
| Cu : CountryCH          | -0.14888 | 0.03699    | 281.7338 | -4.02502 | <0.001   | *** |
| OC : CountryFR          | 0.157312 | 0.060851   | 354.5405 | 2.585195 | 0.010    | *   |
| OC : CountryDE          | 0.107011 | 0.067591   | 369.4361 | 1.583201 | 0.114    |     |
| OC : CountryRO          | 0.324323 | 0.10282    | 324.617  | 3.154276 | 0.002    | **  |
| OC : CountryCH          | 0.181851 | 0.048205   | 357.3553 | 3.772468 | <0.001   | *** |
| C/N : CountryFR         | -0.01839 | 0.045213   | 342.4341 | -0.40675 | 0.684    |     |
| C/N : CountryDE         | 0.01648  | 0.045262   | 366.4356 | 0.364099 | 0.716    |     |
| C/N : CountryRO         | -0.23686 | 0.105041   | 357.2218 | -2.25492 | 0.025    | *   |
| C/N : CountryCH         | -0.06592 | 0.035336   | 381.2228 | -1.8656  | 0.063    | .   |
| pH : CountryFR          | 0.021085 | 0.074653   | 354.2858 | 0.282445 | 0.778    |     |
| pH : CountryDE          | 0.196823 | 0.105291   | 369.673  | 1.869317 | 0.062    | .   |
| pH : CountryRO          | 0.164421 | 0.076248   | 359.9146 | 2.156382 | 0.032    | *   |
| pH : CountryCH          | 0.095831 | 0.075491   | 364.9807 | 1.269441 | 0.205    |     |
| clay : CountryFR        | -0.12925 | 0.052756   | 345.6988 | -2.44988 | 0.015    | *   |
| clay : CountryDE        | -0.04043 | 0.034276   | 347.853  | -1.17961 | 0.239    |     |
| clay : CountryRO        | 0.066003 | 0.057632   | 342.2233 | 1.145259 | 0.253    |     |
| clay : CountryCH        | -0.06362 | 0.045582   | 248.7779 | -1.39573 | 0.164    |     |

**Table S7**

Summary coefficients from linear mixed effect model fitted by maximum likelihood for fungal OTU richness. Plot within vineyard was included in the models as nested random factor (1|vineyard/ plot/year) and country (AT, Austria; CH, Switzerland; DE, Germany; FR, France; RO, Romania) was included as interaction term for all analyses. The symbol ":" in the fixed factor column, indicates the interaction of the fixed factor with the country. (Significances were obtained by t-tests using Satterthwaite's method; '\*\*\*' significant at  $p < 0.001$ ; '\*\*' significant at  $p < 0.01$ ; '\*' significant at  $p < 0.05$ ; '.' significant at  $p < 0.1$ )

| Fixed factor            | Estimate | Std. Error | df     | t value | Pr(> t ) | sig |
|-------------------------|----------|------------|--------|---------|----------|-----|
| (Intercept)             | 386.46   | 35.49      | 253.68 | 10.89   | 0        | *** |
| disturbance             | -32.95   | 16.1       | 250.64 | -2.05   | 0.042    | *   |
| Cu                      | 28.15    | 11.71      | 358.44 | 2.4     | 0.017    | *   |
| C org                   | -37.98   | 18.44      | 349.47 | -2.06   | 0.04     | *   |
| C/N                     | 9.91     | 12.73      | 347.78 | 0.78    | 0.437    |     |
| pH                      | -83.51   | 30.21      | 337.42 | -2.76   | 0.006    | **  |
| clay                    | 44.6     | 12.16      | 352.35 | 3.67    | 0        | *** |
| CountryFR               | -186.4   | 40.59      | 343.28 | -4.59   | 0        | *** |
| CountryDE               | 26.45    | 35.43      | 341.1  | 0.75    | 0.456    |     |
| CountryRO               | -349.76  | 56.79      | 324.23 | -6.16   | 0        | *** |
| CountryCH               | -120.13  | 36.5       | 375.29 | -3.29   | 0.001    | **  |
| disturbance : CountryFR | 49.71    | 17.69      | 342.32 | 2.81    | 0.005    | **  |
| disturbance : CountryDE | 48.81    | 12.9       | 313.81 | 3.78    | 0        | *** |
| disturbance : CountryRO | 64.24    | 17.32      | 344.27 | 3.71    | 0        | *** |
| disturbance : CountryCH | 13.34    | 16.15      | 397.52 | 0.83    | 0.409    |     |
| Cu : CountryFR          | -31.86   | 16.67      | 342.63 | -1.91   | 0.057    | .   |
| Cu : CountryDE          | -19.33   | 18.55      | 378.69 | -1.04   | 0.298    |     |
| Cu : CountryRO          | -50.01   | 21.89      | 331.56 | -2.28   | 0.023    | *   |
| Cu : CountryCH          | -25.91   | 17.11      | 392.48 | -1.51   | 0.131    |     |
| C org : CountryFR       | 56.71    | 25.91      | 325.87 | 2.19    | 0.029    | *   |
| C org : CountryDE       | 47.99    | 29.26      | 344.99 | 1.64    | 0.102    |     |
| C org : CountryRO       | 36.03    | 43.44      | 334.12 | 0.83    | 0.408    |     |
| C org : CountryCH       | 65.78    | 20.81      | 364.1  | 3.16    | 0.002    | **  |
| C/N : CountryFR         | -7.65    | 19.19      | 327.65 | -0.4    | 0.69     |     |
| C/N : CountryDE         | 14.05    | 19.63      | 359.37 | 0.72    | 0.475    |     |
| C/N : CountryRO         | -15.92   | 44.89      | 329.19 | -0.35   | 0.723    |     |
| C/N : CountryCH         | -34.02   | 15.3       | 356.51 | -2.22   | 0.027    | *   |
| pH : CountryFR          | 60.63    | 31.79      | 343.9  | 1.91    | 0.057    | .   |
| pH : CountryDE          | 102.39   | 45.35      | 341.6  | 2.26    | 0.025    | *   |
| pH : CountryRO          | 64.27    | 32.44      | 333.92 | 1.98    | 0.048    | *   |
| pH : CountryCH          | 103.02   | 33.05      | 388.63 | 3.12    | 0.002    | **  |
| clay : CountryFR        | -36.92   | 22.56      | 343.36 | -1.64   | 0.103    |     |
| clay : CountryDE        | -41.62   | 14.77      | 355.63 | -2.82   | 0.005    | **  |
| clay : CountryRO        | -27.35   | 24.61      | 340.44 | -1.11   | 0.267    |     |
| clay : CountryCH        | -34.89   | 21.44      | 368.53 | -1.63   | 0.104    |     |

**Table S8**

Summary coefficients from linear mixed effect model fitted by maximum likelihood for fungal OTU shannon index. Plot within vineyard was included in the models as nested random factor (1|vineyard/ plot/year) and country (AT, Austria; CH, Switzerland; DE, Germany; FR, France; RO, Romania) was included as interaction term for all analyses. The symbol ":" in the fixed factor column, indicates the interaction of the fixed factor with the country. (Significances were obtained by t-tests using Satterthwaite's method; '\*\*\*' significant at  $p < 0.001$ ; '\*\*' significant at  $p < 0.01$ ; '\*' significant at  $p < 0.05$ ; '.' significant at  $p < 0.1$ )

| Fixed factor            | Estimate | Std. Error | df     | t value | Pr(> t ) | sig |
|-------------------------|----------|------------|--------|---------|----------|-----|
| (Intercept)             | 4.191    | 0.177      | 298.67 | 23.624  | <0.001   | *** |
| disturbance             | 0.009    | 0.080      | 292.91 | 0.109   | 0.913    |     |
| Cu                      | 0.097    | 0.071      | 388.46 | 1.371   | 0.171    |     |
| C org                   | 0.004    | 0.114      | 400.85 | 0.037   | 0.970    |     |
| C/N                     | 0.080    | 0.079      | 401.00 | 1.017   | 0.310    |     |
| pH                      | -0.454   | 0.190      | 398.52 | -2.388  | 0.017    | *   |
| clay                    | 0.046    | 0.075      | 399.68 | 0.618   | 0.537    |     |
| CountryFR               | -1.115   | 0.251      | 399.79 | -4.433  | <0.001   | *** |
| CountryDE               | 0.097    | 0.224      | 391.75 | 0.433   | 0.665    |     |
| CountryRO               | -1.227   | 0.364      | 392.79 | -3.376  | <0.001   | *** |
| CountryCH               | -0.327   | 0.220      | 399.23 | -1.490  | 0.137    |     |
| disturbance : CountryFR | -0.099   | 0.110      | 400.40 | -0.903  | 0.367    |     |
| disturbance : CountryDE | -0.058   | 0.085      | 351.29 | -0.687  | 0.493    |     |
| disturbance : CountryRO | 0.022    | 0.107      | 399.88 | 0.208   | 0.835    |     |
| disturbance : CountryCH | -0.147   | 0.093      | 381.65 | -1.583  | 0.114    |     |
| Cu : CountryFR          | -0.090   | 0.104      | 400.41 | -0.861  | 0.390    |     |
| Cu : CountryDE          | -0.071   | 0.108      | 357.96 | -0.658  | 0.511    |     |
| Cu : CountryRO          | -0.279   | 0.139      | 398.34 | -2.013  | 0.045    | *   |
| Cu : CountryCH          | -0.119   | 0.094      | 337.72 | -1.268  | 0.206    |     |
| C org : CountryFR       | -0.157   | 0.166      | 391.35 | -0.948  | 0.344    |     |
| C org : CountryDE       | -0.108   | 0.182      | 400.99 | -0.591  | 0.555    |     |
| C org : CountryRO       | 0.094    | 0.276      | 391.74 | 0.342   | 0.733    |     |
| C org : CountryCH       | 0.070    | 0.126      | 396.76 | 0.552   | 0.581    |     |
| C/N : CountryFR         | 0.082    | 0.123      | 392.61 | 0.670   | 0.503    |     |
| C/N : CountryDE         | -0.043   | 0.120      | 398.84 | -0.359  | 0.720    |     |
| C/N : CountryRO         | 0.183    | 0.286      | 393.52 | 0.639   | 0.523    |     |
| C/N : CountryCH         | -0.115   | 0.094      | 399.82 | -1.228  | 0.220    |     |
| pH : CountryFR          | 0.273    | 0.199      | 400.18 | 1.372   | 0.171    |     |
| pH : CountryDE          | 0.578    | 0.283      | 400.33 | 2.038   | 0.042    | *   |
| pH : CountryRO          | 0.289    | 0.205      | 397.45 | 1.406   | 0.160    |     |
| pH : CountryCH          | 0.441    | 0.199      | 400.87 | 2.212   | 0.028    | *   |
| clay : CountryFR        | 0.224    | 0.141      | 400.70 | 1.591   | 0.112    |     |
| clay : CountryDE        | -0.008   | 0.090      | 396.16 | -0.093  | 0.926    |     |
| clay : CountryRO        | 0.283    | 0.154      | 400.85 | 1.838   | 0.067    | .   |
| clay : CountryCH        | 0.029    | 0.113      | 307.65 | 0.259   | 0.796    |     |



**Table S9**

Results of Indicator species analysis of bacterial and fungal communities at European and country level (AT, Austria; CH, Switzerland; DE, Germany; FR, France; RO, Romania). Values for specificity (Value A) and sensitivity (value B) and indicator values (Ind. Val. ) follow De Cáceres, Legendre, 2009. P-values based on permutation tests ('\*\*\*' significant at  $p < 0.001$ ; '\*\*'  $p < 0.01$ ; '\*'  $p < 0.05$ ; '.'  $p < 0.1$ ). Relative abundances correspond to total sequence numbers in the given data set. Indicator taxa for individual or combined levels of soil disturbance are shown, if they met the pre-defined criteria (Ind. Value  $> 0.6$ ,  $p < 0.05$ ). Indicator taxa for the European level or for at least two countries are given in bold.

| Taxon                                        | Data set | A      | B      | Ind. Val. | p-value    | relative abundance [%] |
|----------------------------------------------|----------|--------|--------|-----------|------------|------------------------|
| <b>bacteria</b>                              |          |        |        |           |            |                        |
| <b>soil disturbance 'low'</b>                |          |        |        |           |            |                        |
| Aquabacterium                                | AT       | 0.9516 | 0.4444 | 0.6503007 | 0.0044 **  | 0.004                  |
| Actinocorallia                               | CH       | 0.7755 | 0.475  | 0.6069287 | 0.0002 *** | 0.006                  |
| Bauldia                                      | FR       | 0.7778 | 0.5556 | 0.6573779 | 0.0011 **  | 0.005                  |
| Demequinaceae_unclassified                   | FR       | 0.6582 | 0.5556 | 0.604728  | 0.0058 **  | 0.006                  |
| Gp1_unclassified                             | RO       | 0.5974 | 0.6667 | 0.6310995 | 0.0465 *   | 0.022                  |
| <b>soil disturbance 'low + intermediate'</b> |          |        |        |           |            |                        |
| <b>Dyadobacter</b>                           | AT       | 0.8571 | 0.8333 | 0.8451162 | 0.0012 **  | 0.021                  |
| Enterobacteriaceae_unclassified              | AT       | 0.978  | 0.6389 | 0.7904709 | 0.0054 **  | 0.022                  |
| Acinetobacter                                | AT       | 0.9913 | 0.3889 | 0.6208998 | 0.0112 *   | 0.007                  |
| <b>Dyadobacter</b>                           | CH       | 0.8954 | 0.7111 | 0.7979467 | 0.0001 *** | 0.017                  |
| Tahibacter                                   | CH       | 0.8858 | 0.5222 | 0.6801211 | 0.0013 **  | 0.012                  |
| Sphingopyxis                                 | CH       | 0.8822 | 0.5    | 0.6641536 | 0.0014 **  | 0.007                  |
| Taibaiella                                   | CH       | 0.9607 | 0.3889 | 0.6112415 | 0.0008 *** | 0.006                  |
| Smaragdicoccus                               | DE       | 0.8904 | 0.4167 | 0.6091221 | 0.0055 **  | 0.003                  |
| Epilithonimonas                              | FR       | 1      | 0.25   | 0.5       | 0.049 *    | 0.003                  |
| <b>soil disturbance 'low + high'</b>         |          |        |        |           |            |                        |
| Peredibacter                                 | RO       | 0.8706 | 0.6111 | 0.7293995 | 0.0369 *   | 0.012                  |
| Desulfuromonas                               | FR       | 0.946  | 0.5833 | 0.7428336 | 0.0039 **  | 0.020                  |
| <b>soil disturbance 'intermediate'</b>       |          |        |        |           |            |                        |
| Nannocystis                                  | FR       | 0.8809 | 0.6667 | 0.7663524 | 0.0126 *   | 0.030                  |

| Taxon                                         | Data set | A       | B       | Ind. Val. | p-value    | relative abundance [%] |
|-----------------------------------------------|----------|---------|---------|-----------|------------|------------------------|
| Enterobacter                                  | FR       | 0.7747  | 0.7222  | 0.7479895 | 0.0452 *   | 0.056                  |
| <b>soil disturbance 'intermediate + high'</b> |          |         |         |           |            |                        |
| <b>Pontibacter</b>                            | Europe   | 0.90777 | 0.58736 | 0.7301971 | 0.0001 *** | 0.041                  |
| <b>Hymenobacter</b>                           | Europe   | 0.91527 | 0.52788 | 0.6950919 | 0.0001 *** | 0.016                  |
| <b>Pontibacter</b>                            | AT       | 0.8755  | 1       | 0.9356816 | 0.0001 *** | 0.059                  |
| <b>Hymenobacter</b>                           | AT       | 0.9545  | 0.8333  | 0.8918435 | 0.0002 **  | 0.029                  |
| Cytophagaceae_unclassified                    | AT       | 0.8509  | 0.8889  | 0.8696925 | 0.001 **   | 0.025                  |
| <b>Armatimonadetes_unclassified</b>           | AT       | 0.9054  | 0.75    | 0.8240449 | 0.0007 *** | 0.011                  |
| Beijerinckiaceae_unclassified                 | AT       | 0.886   | 0.7222  | 0.7999182 | 0.0018 **  | 0.008                  |
| Byssovorax                                    | AT       | 0.8516  | 0.75    | 0.7991871 | 0.0103 *   | 0.008                  |
| Nocardiopsis                                  | AT       | 0.9211  | 0.5556  | 0.7153762 | 0.0109 *   | 0.005                  |
| Segetibacter                                  | AT       | 0.9694  | 0.5     | 0.696204  | 0.0094 **  | 0.006                  |
| Chloroflexales_unclassified                   | AT       | 0.8571  | 0.5278  | 0.6725901 | 0.0408 *   | 0.014                  |
| Acidobacteria_Gp1_unclassified                | CH       | 0.9525  | 0.6067  | 0.7601853 | 0.002 **   | 0.037                  |
| <b>Pontibacter</b>                            | DE       | 0.9573  | 0.9583  | 0.9577999 | 0.0001 *** | 0.086                  |
| Alcaligenaceae_unclassified                   | DE       | 0.9007  | 0.8194  | 0.8590888 | 0.0001 *** | 0.022                  |
| <b>Hymenobacter</b>                           | DE       | 0.946   | 0.6944  | 0.8104952 | 0.0001 *** | 0.021                  |
| Rhodocytophaga                                | DE       | 0.897   | 0.7222  | 0.8048686 | 0.0001 *** | 0.012                  |
| Kaistia                                       | DE       | 0.8884  | 0.6389  | 0.7533915 | 0.0004 *** | 0.009                  |
| Hydrogenophaga                                | DE       | 0.8994  | 0.5694  | 0.7156245 | 0.0002 *** | 0.007                  |
| Algoriphagus                                  | DE       | 0.8828  | 0.5417  | 0.6915293 | 0.0016 **  | 0.009                  |
| Flavobacteriaceae_unclassified                | DE       | 0.8607  | 0.5556  | 0.6915236 | 0.0013 **  | 0.005                  |
| <b>Armatimonadetes_unclassified</b>           | DE       | 0.8298  | 0.4583  | 0.6166825 | 0.0048 **  | 0.003                  |
| Massilia                                      | FR       | 0.9477  | 0.8889  | 0.9178292 | 0.0001 *** | 0.080                  |
| Sorangium                                     | FR       | 0.9251  | 0.8611  | 0.8925265 | 0.0001 *** | 0.049                  |
| Variovorax                                    | FR       | 0.8897  | 0.8889  | 0.8892999 | 0.0006 *** | 0.039                  |
| Herpetosiphon                                 | FR       | 0.8897  | 0.8056  | 0.8466064 | 0.0009 *** | 0.023                  |
| Peredibacter                                  | FR       | 0.9371  | 0.75    | 0.8383466 | 0.0059 **  | 0.026                  |
| Geodermatophilus                              | FR       | 0.8547  | 0.8056  | 0.8297869 | 0.0005 *** | 0.030                  |
| Myxococcus                                    | FR       | 0.8806  | 0.7222  | 0.7974768 | 0.0058 **  | 0.020                  |
| Chitinophaga                                  | FR       | 0.98    | 0.6389  | 0.7912787 | 0.0001 *** | 0.033                  |

| Taxon                        | Data set | A      | B      | Ind. Val. | p-value    | relative abundance [%] |
|------------------------------|----------|--------|--------|-----------|------------|------------------------|
| Armatimonadetes_unclassified | FR       | 0.9176 | 0.6667 | 0.7821534 | 0.0003 *** | 0.013                  |
| Cystobacter                  | FR       | 0.931  | 0.6389 | 0.7712431 | 0.0006 *** | 0.019                  |
| Achromobacter                | FR       | 0.9815 | 0.5556 | 0.7384588 | 0.0042 **  | 0.016                  |
| Porphyrobacter               | FR       | 0.9465 | 0.5    | 0.6879317 | 0.0066 **  | 0.014                  |
| <b>Pontibacter</b>           | FR       | 0.8833 | 0.5278 | 0.6827926 | 0.0054 **  | 0.026                  |
| Sphingobium                  | FR       | 0.9512 | 0.4722 | 0.6701915 | 0.0276 *   | 0.018                  |
| <b>Hymenobacter</b>          | FR       | 0.9776 | 0.4444 | 0.6591248 | 0.0145 *   | 0.016                  |
| Rubellimicrobium             | FR       | 0.92   | 0.4722 | 0.6591085 | 0.0174 *   | 0.009                  |

#### soil disturbance 'high'

|                  |    |        |        |           |            |         |
|------------------|----|--------|--------|-----------|------------|---------|
| Parasegetibacter | DE | 0.7667 | 0.5278 | 0.6361323 | 0.0001 *** | > 0.001 |
|------------------|----|--------|--------|-----------|------------|---------|

#### fungi

##### soil disturbance 'low'

|                                            |    |         |         |           |            |       |
|--------------------------------------------|----|---------|---------|-----------|------------|-------|
| s__Cistella_albidolutea_SH198116.07FU      | AT | 0.8676  | 0.5556  | 0.6942473 | 0.0008 *** | 0.212 |
| s__Phaeosphaeria_sp_SH182986.07FU          | CH | 0.94561 | 0.40476 | 0.6186668 | 0.0002 *** | 0.123 |
| f__Claroideoglomeraceae                    | DE | 0.8857  | 0.6571  | 0.762893  | 0.0001 *** | 0.023 |
| g__Claroideoglossus                        | DE | 0.8197  | 0.4571  | 0.6121499 | 0.0002 *** | 0.022 |
| f__Tubeufiaceae                            | FR | 0.9749  | 1       | 0.9873712 | 0.0001 *** | 0.044 |
| s__Pyrenochaeta_sp_SH019261.07FU           | FR | 0.9974  | 0.94444 | 0.9705532 | 0.0001 *** | 0.117 |
| g__Cyphellophora                           | FR | 0.8617  | 0.7778  | 0.8186524 | 0.0002 *** | 0.027 |
| s__Lecanicillium_primulinum_SH204659.07FU  | FR | 0.9675  | 0.6667  | 0.8031278 | 0.0001 *** | 0.020 |
| s__Scytalidium_circinatum_SH218618.07FU    | FR | 0.9643  | 0.6667  | 0.8017837 | 0.0001 *** | 0.011 |
| s__Heteroconium_sp_SH198136.07FU           | FR | 0.8693  | 0.7222  | 0.7923611 | 0.0005 *** | 0.029 |
| g__Lecanicillium                           | FR | 0.9922  | 0.6111  | 0.7787001 | 0.0001 *** | 0.004 |
| s__Pyrenochaetopsis_pratorum_SH198998.07FU | FR | 0.9547  | 0.6111  | 0.7638332 | 0.0001 *** | 0.053 |
| s__Cylindrotrichum_sp_SH456111.07FU        | FR | 0.9442  | 0.6111  | 0.7596069 | 0.0001 *** | 0.015 |
| s__Tetracladium_sp_SH026253.07FU           | FR | 0.9102  | 0.6111  | 0.7458022 | 0.0002 *** | 0.011 |
| s__Auricularia_sp_SH024175.07FU            | FR | 1       | 0.05556 | 0.745356  | 0.0001 *** | 0.017 |
| s__Cryptococcus_sp_SH181630.07FU           | FR | 0.7561  | 0.6667  | 0.7099754 | 0.0177 *   | 0.004 |
| s__Phoma_paspali_SH215817.07FU             | FR | 0.9591  | 0.5     | 0.6925056 | 0.0004 *** | 0.025 |

| Taxon                                        | Data set | A      | B      | Ind. Val. | p-value     | relative abundance [%] |
|----------------------------------------------|----------|--------|--------|-----------|-------------|------------------------|
| g__Schwanniomyces                            | FR       | 0.956  | 0.4444 | 0.6518234 | 0.0059 **   | 0.048                  |
| s__Colletotrichum_destructivum_SH375584.07FU | FR       | 0.8045 | 0.5    | 0.6342497 | 0.0025 **   | 0.008                  |
| f__Gnomoniaceae                              | FR       | 0.9967 | 0.3889 | 0.6225869 | 0.014 *     | 0.073                  |
| f__Hypocreaceae                              | FR       | 0.8721 | 0.4444 | 0.6225728 | 0.0081 **   | 0.003                  |
| g__Colletotrichum                            | FR       | 0.7304 | 0.5    | 0.6043146 | 0.0107 *    | 0.007                  |
| <b>soil disturbance 'low + intermediate'</b> |          |        |        |           |             |                        |
| f__Glomeraceae                               | AT       | 0.9166 | 0.5278 | 0.6955305 | 0.0077 **   | 0.057                  |
| s__Cryptococcus_chernovii_SH197624.07FU      | AT       | 0.947  | 0.4722 | 0.668736  | 0.0123 *    | 0.037                  |
| f__Pleosporales_fam_Incertae_sedis           | CH       | 0.9679 | 0.5158 | 0.7065686 | 0.0029 **   | 0.319                  |
| s__Monographella_cucumerina_SH527845.07FU    | CH       | 0.967  | 0.4526 | 0.6615904 | 0.0026 **   | 0.346                  |
| f__Glomeraceae                               | DE       | 0.9263 | 0.8429 | 0.8835932 | 0.0001 **** | 0.245                  |
| s__Sarocladium_strictum_SH210203.07FU        | DE       | 0.9138 | 0.4286 | 0.6257871 | 0.0165 *    | 0.474                  |
| s__Pyrenochaetopsis_leptospora_SH198996.07FU | FR       | 0.9714 | 1      | 0.985592  | 0.0001 ***  | 0.474                  |
| s__Cryptococcus_heimaeyensis_SH181631.07FU   | FR       | 0.8512 | 0.6111 | 0.7212177 | 0.0187 *    | 0.007                  |
| s__Sarocladium_strictum_SH210203.07FU        | FR       | 0.9153 | 0.5278 | 0.6950186 | 0.0108 *    | 0.008                  |
| <b>soil disturbance 'low + high'</b>         |          |        |        |           |             |                        |
| s__Tetracladium_sp_SH211298.07FU             | CH       | 0.9674 | 0.4634 | 0.6695681 | 0.0071 **   | 0.153                  |
| g__Preussia                                  | CH       | 0.925  | 0.4512 | 0.6460593 | 0.0003 ***  | 0.269                  |
| g__Tetracladium                              | CH       | 0.8628 | 0.4512 | 0.6239486 | 0.0059 **   | 0.067                  |
| s__Mycoarthritis_corallina_SH198115.07FU     | CH       | 0.9025 | 0.4146 | 0.6117204 | 0.0181 *    | 0.351                  |
| o__Agaricales                                | FR       | 0.9798 | 0.9444 | 0.9619799 | 0.0212 *    | 0.713                  |
| g__Ilyonectria                               | FR       | 0.9859 | 0.7778 | 0.8756933 | 0.0495 *    | 0.192                  |
| s__Pyrenochaeta_sp_SH014374.07FU             | FR       | 0.974  | 0.7778 | 0.8546818 | 0.0001 ***  | 0.121                  |
| s__Cyphellophora_vermisporea_SH105839.07FU   | FR       | 0.974  | 0.75   | 0.8528954 | 0.0017 **   | 0.046                  |
| s__Dactylaria_dimorphospora_SH025283.07FU    | FR       | 0.9344 | 0.5556 | 0.7204962 | 0.026 *     | 0.057                  |
| g__Conocybe                                  | FR       | 0.9771 | 0.4444 | 0.6590036 | 0.0046 **   | 0.006                  |
| s__Acremonium_rutilum_SH207064.07FU          | FR       | 0.9578 | 0.4444 | 0.6524457 | 0.0053 **   | 0.011                  |
| <b>soil disturbance 'intermediate'</b>       |          |        |        |           |             |                        |

| Taxon                                           | Data set | A      | B      | Ind. Val. | p-value    | relative abundance [%] |
|-------------------------------------------------|----------|--------|--------|-----------|------------|------------------------|
| s__Stemphylium_herbarum_SH387143.07FU           | RO       | 0.8617 | 0.5556 | 0.6918791 | 0.0005 *** | 0.005                  |
| <b>soil disturbance 'intermediate + high'</b>   |          |        |        |           |            |                        |
| f__Pleosporales_fam_Incertae_sedis              | AT       | 0.8874 | 0.75   | 0.8158327 | 0.0048 **  | 0.200                  |
| s__Mortierella_antarctica_SH220322.07FU         | AT       | 0.9452 | 0.4167 | 0.6275514 | 0.0213 *   | 0.018                  |
| c__Chytridiomycetes                             | DE       | 0.8317 | 0.7606 | 0.7953596 | 0.0004 *** | 0.038                  |
| s__Spizellomyces_dolichospermus_SH183868.07FU   | DE       | 0.8962 | 0.7042 | 0.7944132 | 0.0001 *** | 0.073                  |
| s__Minimedusa_polyspora_SH201127.07FU           | FR       | 0.9513 | 0.7222 | 0.8288733 | 0.0012 **  | 0.031                  |
| s__Cladorrhinum_sp_SH522900.07FU                | FR       | 0.9    | 0.6944 | 0.803641  | 0.004 **   | 0.042                  |
| p__Chytridiomycota                              | FR       | 0.8152 | 0.75   | 0.7819411 | 0.0018 **  | 0.015                  |
| g__Spizellomyces                                | FR       | 0.9868 | 0.5556 | 0.7404361 | 0.0011 **  | 0.013                  |
| s__Spizellomyces_dolichospermus_SH183868.07FU   | FR       | 0.9116 | 0.5833 | 0.7292314 | 0.0118 *   | 0.021                  |
| g__Cladorrhinum                                 | FR       | 0.9761 | 0.5278 | 0.7177526 | 0.0072 **  | 0.010                  |
| s__Mortierella_sp_SH216193.07FU                 | FR       | 0.9833 | 0.4722 | 0.6814176 | 0.0012 **  | 0.012                  |
| g__Helgardia                                    | FR       | 0.9042 | 0.4722 | 0.6534248 | 0.014 *    | 0.019                  |
| s__Mortierella_sp_SH180140.07FU                 | FR       | 0.8864 | 0.4444 | 0.6276459 | 0.0019 **  | 0.006                  |
| <b>soil disturbance 'high'</b>                  |          |        |        |           |            |                        |
| s__Spizellomyces_pseudodichotomus_SH196353.07FU | AT       | 0.9035 | 0.6111 | 0.7430757 | 0.0001 *** | 0.0725329              |
| c__Chytridiomycetes                             | AT       | 0.7844 | 0.5    | 0.6262617 | 0.0006 *** | 0.0586327              |
| s__Cryptococcus_adeliensis_SH405379.07FU        | AT       | 0.8377 | 0.4444 | 0.6101579 | 0.0343 *   | 0.0772907              |
| s__Hymenoscyphus_sp_SH174399.07FU               | FR       | 0.9931 | 0.5556 | 0.7427956 | 0.0491 *   | 0.6720102              |

**Table S10**

Coefficients from linear mixed effect model fitted by maximum likelihood for microbial respiration. Plot within vineyard was included in the models as nested random factor (1|vineyard/ plot/year) and country (AT, Austria; CH, Switzerland; DE, Germany; FR, France; RO, Romania) was included as interaction term for all analyses. The symbol ":" in the fixed factor column, indicates the interaction of the fixed factor with the country. (Significances were obtained by t-tests using Satterthwaite's method; '\*\*\*' significant at  $p < 0.001$ ; '\*\*' significant at  $p < 0.01$ ; '\*' significant at  $p < 0.05$ ; '.' significant at  $p < 0.1$ )

| Fixed Factor            | Estimate | Std. Error | df     | t value | Pr(> t ) | sig |
|-------------------------|----------|------------|--------|---------|----------|-----|
| (Intercept)             | 1.458    | 0.065      | 162.05 | 22.56   | 0        | *** |
| disturbance             | -0.109   | 0.026      | 93.72  | -4.25   | 0        | *** |
| Cu                      | -0.019   | 0.024      | 577.39 | -0.8    | 0.423    |     |
| C org                   | 0.26     | 0.041      | 507.36 | 6.42    | 0        | *** |
| C/N                     | -0.142   | 0.035      | 600.37 | -4.09   | 0        | *** |
| pH                      | -0.086   | 0.073      | 573.32 | -1.18   | 0.24     |     |
| clay                    | -0.028   | 0.026      | 545.19 | -1.07   | 0.284    |     |
| CountryFR               | -0.27    | 0.075      | 609.48 | -3.6    | 0        | *** |
| CountryDE               | -0.37    | 0.126      | 616.63 | -2.94   | 0.003    | **  |
| CountryRO               | -0.204   | 0.109      | 624.59 | -1.87   | 0.062    | .   |
| CountryCH               | -0.055   | 0.1        | 318.76 | -0.55   | 0.582    |     |
| disturbance : CountryFR | 0.023    | 0.03       | 570.59 | 0.77    | 0.442    |     |
| disturbance : CountryDE | 0.181    | 0.035      | 569.8  | 5.2     | 0        | *** |
| disturbance : CountryRO | 0.054    | 0.033      | 561.05 | 1.64    | 0.101    |     |
| disturbance : CountryCH | -0.056   | 0.038      | 270.3  | -1.49   | 0.137    |     |
| Cu : CountryFR          | -0.101   | 0.034      | 625.26 | -2.97   | 0.003    | **  |
| Cu : CountryDE          | 0.042    | 0.055      | 559.81 | 0.77    | 0.44     |     |
| Cu : CountryRO          | -0.016   | 0.047      | 628.1  | -0.35   | 0.729    |     |
| Cu : CountryCH          | 0.121    | 0.04       | 139.59 | 3.02    | 0.003    | **  |
| C org : CountryFR       | 0.005    | 0.058      | 618.39 | 0.09    | 0.929    |     |
| C org : CountryDE       | 0.185    | 0.084      | 616.94 | 2.2     | 0.028    | *   |
| C org : CountryRO       | -0.189   | 0.095      | 616.06 | -2      | 0.046    | *   |
| C org : CountryCH       | -0.007   | 0.05       | 360.25 | -0.14   | 0.886    |     |
| C/N : CountryFR         | 0.069    | 0.04       | 624.64 | 1.74    | 0.083    | .   |
| C/N : CountryDE         | -0.039   | 0.079      | 574.24 | -0.5    | 0.62     |     |
| C/N : CountryRO         | 0.135    | 0.047      | 622.53 | 2.9     | 0.004    | **  |
| C/N : CountryCH         | 0.084    | 0.051      | 482.82 | 1.67    | 0.096    | .   |
| pH : CountryFR          | 0.037    | 0.077      | 570.23 | 0.48    | 0.63     |     |
| pH : CountryDE          | -0.059   | 0.153      | 627.48 | -0.39   | 0.7      |     |
| pH : CountryRO          | 0.046    | 0.076      | 627.08 | 0.6     | 0.548    |     |
| pH : CountryCH          | 0.139    | 0.083      | 327.7  | 1.67    | 0.097    | .   |
| clay : CountryFR        | -0.079   | 0.055      | 420.76 | -1.45   | 0.148    |     |
| clay : CountryDE        | 0.052    | 0.045      | 606.23 | 1.15    | 0.253    |     |
| clay : CountryRO        | 0.137    | 0.057      | 430.43 | 2.41    | 0.017    | *   |
| clay : CountryCH        | 0.11     | 0.048      | 116.34 | 2.3     | 0.023    | *   |

**Table S11**

Summary coefficients from linear mixed effect model fitted by maximum likelihood for decomposition of labile substrate. Plot within vineyard was included in the models as nested random factor (1|vineyard/ plot/year) and country (AT, Austria; CH, Switzerland; DE, Germany; FR, France; RO, Romania) was included as interaction term for all analyses. The symbol ":" in the fixed factor column, indicates the interaction of the fixed factor with the country. (Significances were obtained by t-tests using Satterthwaite's method; '\*\*\*' significant at  $p < 0.001$ ; '\*\*' significant at  $p < 0.01$ ; '\*' significant at  $p < 0.05$ ; '.' significant at  $p < 0.1$ )

| Fixed factor            | Estimate | Std. Error | df     | t value | Pr(> t ) | sig |
|-------------------------|----------|------------|--------|---------|----------|-----|
| (Intercept)             | 52.794   | 1.832      | 216.3  | 28.82   | 0        | *** |
| disturbance             | 0.718    | 0.741      | 187.74 | 0.97    | 0.334    |     |
| Cu                      | -0.39    | 0.757      | 311.12 | -0.52   | 0.607    |     |
| C org                   | 0.721    | 1.235      | 306.5  | 0.58    | 0.56     |     |
| C/N                     | -1.909   | 1.02       | 310.21 | -1.87   | 0.062    | .   |
| pH                      | 0.939    | 2.105      | 298.4  | 0.45    | 0.656    |     |
| clay                    | -0.345   | 0.81       | 299.87 | -0.43   | 0.671    |     |
| CountryFR               | 3.367    | 2.384      | 287.41 | 1.41    | 0.159    |     |
| CountryDE               | 10.729   | 3.562      | 284.09 | 3.01    | 0.003    | **  |
| CountryRO               | 5.378    | 3.47       | 289.88 | 1.55    | 0.122    |     |
| CountryCH               | 1.297    | 2.822      | 267.22 | 0.46    | 0.646    |     |
| disturbance : CountryFR | 1.807    | 0.985      | 256.83 | 1.83    | 0.068    | .   |
| disturbance : CountryDE | -2.801   | 1.06       | 245.49 | -2.64   | 0.009    | **  |
| disturbance : CountryRO | -0.116   | 1.025      | 248.13 | -0.11   | 0.91     |     |
| disturbance : CountryCH | -0.748   | 1.111      | 252.39 | -0.67   | 0.501    |     |
| Cu : CountryFR          | -1.443   | 1.03       | 285.09 | -1.4    | 0.162    |     |
| Cu : CountryDE          | 1.598    | 1.527      | 305.4  | 1.05    | 0.296    |     |
| Cu : CountryRO          | 1.864    | 1.465      | 310.07 | 1.27    | 0.204    |     |
| Cu : CountryCH          | 4.179    | 1.255      | 126.36 | 3.33    | 0.001    | **  |
| C org : CountryF        | -0.935   | 1.555      | 266.85 | -0.6    | 0.548    |     |
| C org : CountryDE       | -2.495   | 2.594      | 305.2  | -0.96   | 0.337    |     |
| C org : CountryRO       | -5.947   | 3.048      | 304.5  | -1.95   | 0.052    |     |
| C org : CountryCH       | 0.137    | 1.433      | 286.59 | 0.1     | 0.924    |     |
| C/N : CountryF          | 3.605    | 1.169      | 285.71 | 3.08    | 0.002    | **  |
| C/N : CountryDE         | 2.985    | 2.089      | 306.56 | 1.43    | 0.154    |     |
| C/N : CountryRO         | 10.582   | 3.543      | 257.21 | 2.99    | 0.003    | **  |
| C/N : CountryCH         | -0.23    | 1.438      | 277.64 | -0.16   | 0.873    |     |
| pH : CountryFR          | 0.075    | 2.216      | 306.03 | 0.03    | 0.973    |     |
| pH : CountryDE          | 4.68     | 4.276      | 287.01 | 1.09    | 0.275    |     |
| pH : CountryRO          | -2.837   | 2.202      | 289.69 | -1.29   | 0.199    |     |
| pH : CountryCH          | -0.88    | 2.352      | 295.15 | -0.37   | 0.708    |     |
| clay : CountryFR        | -1.189   | 1.335      | 288.25 | -0.89   | 0.374    |     |
| clay : CountryDE        | 1.36     | 1.133      | 298.87 | 1.2     | 0.231    |     |
| clay : CountryRO        | 5.559    | 1.712      | 306.7  | 3.25    | 0.001    | **  |
| clay : CountryCH        | 1.188    | 1.456      | 141.6  | 0.82    | 0.416    |     |

**Table S12**

Summary coefficients from linear mixed effect model fitted by maximum likelihood for decomposition of recalcitrant substrate. Plot within vineyard was included in the models as nested random factor (1|vineyard/ plot/year) and country (AT, Austria; CH, Switzerland; DE, Germany; FR, France; RO, Romania) was included as interaction term for all analyses. The symbol ":" in the fixed factor column, indicates the interaction of the fixed factor with the country. (Significances were obtained by t-tests using Satterthwaite's method; '\*\*\*' significant at  $p < 0.001$ ; '\*\*' significant at  $p < 0.01$ ; '\*' significant at  $p < 0.05$ ; '.' significant at  $p < 0.1$ )

| Fixed factor            | Estimate | Std. Error | df  | t value | Pr(> t ) | sig |
|-------------------------|----------|------------|-----|---------|----------|-----|
| (Intercept)             | 24.923   | 2.124      | 301 | 11.74   | 0        | *** |
| disturbance             | 2.399    | 0.934      | 301 | 2.57    | 0.011    | *   |
| Cu                      | 0.391    | 0.854      | 301 | 0.46    | 0.647    |     |
| C org                   | 0.719    | 1.39       | 301 | 0.52    | 0.605    |     |
| C/N                     | 0.071    | 1.18       | 301 | 0.06    | 0.952    |     |
| pH                      | -0.101   | 2.452      | 301 | -0.04   | 0.967    |     |
| clay                    | -2.124   | 0.918      | 301 | -2.31   | 0.021    | *   |
| CountryFR               | 32.52    | 3.029      | 301 | 10.74   | 0        | *** |
| CountryDE               | 10.918   | 4.338      | 301 | 2.52    | 0.012    | *   |
| CountryRO               | -12.643  | 4.272      | 301 | -2.96   | 0.003    | **  |
| CountryCH               | -0.09    | 3.306      | 301 | -0.03   | 0.978    |     |
| disturbance : CountryFR | -1.707   | 1.31       | 301 | -1.3    | 0.194    |     |
| disturbance : CountryDE | -3.107   | 1.346      | 301 | -2.31   | 0.022    | *   |
| disturbance : CountryRO | -0.527   | 1.309      | 301 | -0.4    | 0.687    |     |
| disturbance : CountryCH | -0.006   | 1.304      | 301 | 0       | 0.997    |     |
| Cu : CountryFR          | -1.545   | 1.262      | 301 | -1.22   | 0.222    |     |
| Cu : CountryDE          | 0.833    | 1.686      | 301 | 0.49    | 0.622    |     |
| Cu : CountryRO          | 1.012    | 1.725      | 301 | 0.59    | 0.558    |     |
| Cu : CountryCH          | -2.332   | 1.344      | 301 | -1.73   | 0.084    | .   |
| C org : CountryFR       | -0.079   | 1.978      | 301 | -0.04   | 0.968    |     |
| C org : CountryDE       | -1.991   | 3.029      | 301 | -0.66   | 0.511    |     |
| C org : CountryRO       | 1.256    | 3.454      | 301 | 0.36    | 0.716    |     |
| C org : CountryCH       | 1.16     | 1.601      | 301 | 0.72    | 0.469    |     |
| C/N : CountryFR         | -0.177   | 1.418      | 301 | -0.12   | 0.901    |     |
| C/N : CountryDE         | 2.669    | 2.384      | 301 | 1.12    | 0.264    |     |
| C/N : CountryRO         | 3.149    | 4.357      | 301 | 0.72    | 0.47     |     |
| C/N : CountryCH         | 3.576    | 1.652      | 301 | 2.17    | 0.031    | *   |
| pH : CountryFR          | 0.205    | 2.57       | 301 | 0.08    | 0.936    |     |
| pH : CountryDE          | 0.98     | 5.172      | 301 | 0.19    | 0.85     |     |
| pH : CountryRO          | -2.289   | 2.644      | 301 | -0.87   | 0.387    |     |
| pH : CountryCH          | 0.826    | 2.707      | 301 | 0.31    | 0.761    |     |
| clay : CountryFR        | 1.331    | 1.537      | 301 | 0.87    | 0.387    |     |
| clay : CountryDE        | 3.302    | 1.271      | 301 | 2.6     | 0.01     | **  |
| clay : CountryRO        | 11.184   | 1.896      | 301 | 5.9     | 0        | *** |
| clay : CountryCH        | 1.667    | 1.582      | 301 | 1.05    | 0.293    |     |



**Table S13**

ANOVA table of db-RDA results (a) and variance inflation factors (VIF, b) at the European and country scale. db-RDA results were obtained by stepwise selection of variables using the AIC criterion. Only retained variables shown here. OC: organic carbon; C/N: carbon/nitrogen ratio; Cu: bioavailable soil copper content; pH; clay = clay content, dist = soil disturbance. Df: degrees of freedom; SumOfSqs: Sum Squares; F: pseudo-F value based on 9999 permutations.

| microbial group | data set | a) ANOVA            |     |          |       |         |     |
|-----------------|----------|---------------------|-----|----------|-------|---------|-----|
|                 |          | variable            | Df  | SumOfSqs | F     | p-value | sig |
| bacteria        | EUROPE   | Cu                  | 1   | 3.075    | 22.33 | 0.0001  | *** |
|                 |          | CN                  | 1   | 1.156    | 8.40  | 0.0001  | *** |
|                 |          | OC                  | 1   | 1.366    | 9.92  | 0.0001  | *** |
|                 |          | pH                  | 1   | 0.563    | 4.09  | 0.0001  | *** |
|                 |          | clay                | 1   | 1.184    | 8.60  | 0.0001  | *** |
|                 |          | Residual            | 391 | 54.096   |       |         |     |
|                 |          | R <sup>2</sup>      |     | 0.120    |       |         |     |
|                 |          | adj. R <sup>2</sup> |     | 0.108    |       |         |     |
| fungi           | EUROPE   | Cu                  | 1   | 1.911    | 6.33  | 0.0001  | *** |
|                 |          | CN                  | 1   | 0.733    | 2.43  | 0.0001  | *** |
|                 |          | OC                  | 1   | 1.373    | 4.55  | 0.0001  | *** |
|                 |          | pH                  | 1   | 0.351    | 1.16  | 0.1378  |     |
|                 |          | clay                | 1   | 0.409    | 1.36  | 0.0202  | *   |
|                 |          | Residual            | 396 | 119.560  |       |         |     |
|                 |          | R <sup>2</sup>      |     | 0.038    |       |         |     |
|                 |          | adj. R <sup>2</sup> |     | 0.026    |       |         |     |

159

## 160 **Appendix 5 Detailed acknowledgements**

161 The German team would like to thank Olivia Herczynski for soil DNA extraction and is grateful for the  
162 student assistants who supported us during field work and in the lab. The contract of Brice Giffard  
163 (France) was financed in 2017 via a grant from the PromESSinG project. BG thanks Benjamin Joubard  
164 for soil sampling and DNA extraction, and Pauline Tolle (Bordeaux Sciences Agro) for setting up the  
165 management types in vineyards and coordination of the French vineyard network. The Austrian team  
166 wants to thank Lisa Cibej, Rudi Rizzoli, Sarhan Khalil and Bettina Schlossnikel for their help in data  
167 acquisition during different periods of the project. The Romanian team is grateful to Oana Paula Popa  
168 for soil DNA extraction, Sergiu Ene, Sabina Vlad, Razvan Zaharia for their help with data acquisition,  
169 and to Oana Belu, Aurora Ranca and Ion Vladoi for their collaboration and interest in the project and  
170 for granting us the access to their fields and for their collaboration in the project. The Swiss team is  
171 grateful to Andy Brown, Anne-Laure Fragnière, Franziska Keller and Mervi Laitinen, Lara Volery and  
172 Divija Jatavallabhula as well as Nina Häner and Alix Badel for their dedication to the project and their  
173 help in data acquisition.

174

## 175 Supplementary references

- 176 1. Klindworth A, Pruesse E, Schweer T, Peplies J, Quast C, Horn M et al. Evaluation of general 16S  
177 ribosomal RNA gene PCR primers for classical and next-generation sequencing-based diversity  
178 studies. *Nucleic Acids Res* 2013; 41(1):e1.
- 179 2. Ihrmark K, Bödeker ITM, Cruz-Martinez K, Friberg H, Kubartova A, Schenck J et al. New primers to  
180 amplify the fungal ITS2 region--evaluation by 454-sequencing of artificial and natural communities.  
181 *FEMS Microbiol Ecol* 2012; 82(3):666–77.
- 182 3. Schoch CL, Seifert KA, Huhndorf S, Robert V, Spouge JL, Levesque CA et al. Nuclear ribosomal  
183 internal transcribed spacer (ITS) region as a universal DNA barcode marker for Fungi. *Proc Natl Acad*  
184 *Sci U S A* 2012; 109(16):6241–6.
- 185 4. FastQC: A quality control tool for high throughput sequence data.; 2010. Available from: URL:  
186 <https://www.bioinformatics.babraham.ac.uk/projects/fastqc/>.
- 187 5. Sickle: A sliding-window, adaptive, quality-based trimming tool for FastQ files. Version 1.33; 2011.  
188 Available from: URL: <https://github.com/najoshi/sickle>.
- 189 6. Schloss PD, Westcott SL, Ryabin T, Hall JR, Hartmann M, Hollister EB et al. Introducing mothur:  
190 open-source, platform-independent, community-supported software for describing and comparing  
191 microbial communities. *Appl Environ Microbiol* 2009; 75(23):7537–41.
- 192 7. Quast C, Pruesse E, Yilmaz P, Gerken J, Schweer T, Yarza P et al. The SILVA ribosomal RNA gene  
193 database project: improved data processing and web-based tools. *Nucleic Acids Res* 2013;  
194 41(Database issue):D590-6.
- 195 8. Westcott SL, Schloss PD. OptiClust, an Improved Method for Assigning Amplicon-Based Sequence  
196 Data to Operational Taxonomic Units. *mSphere* 2017; 2(2).
- 197 9. Cole JR, Wang Q, Fish JA, Chai B, McGarrell DM, Sun Y et al. Ribosomal Database Project: data and  
198 tools for high throughput rRNA analysis. *Nucleic Acids Res* 2014; 42(Database issue):D633-42.
- 199 10. Gweon HS, Oliver A, Taylor J, Booth T, Gibbs M, Read DS et al. PIPITS: an automated pipeline for  
200 analyses of fungal internal transcribed spacer sequences from the Illumina sequencing platform.  
201 *Methods in Ecology and Evolution* 2015; 6(8):973–80.
- 202 11. Kõljalg U, Nilsson RH, Abarenkov K, Tedersoo L, Taylor AFS, Bahram M et al. Towards a unified  
203 paradigm for sequence-based identification of fungi. *Mol Ecol* 2013; 22(21):5271–7.
- 204 12. R Core Team. R: A language and environment for Statistical Computing; 2019. Available from:  
205 URL: <https://www.R-project.org/>.
- 206 13. McMurdie PJ, Holmes S. phyloseq: an R package for reproducible interactive analysis and graphics  
207 of microbiome census data. *PLoS ONE* 2013; 8(4):e61217.
- 208 14. Cáceres M de, Legendre P. Associations between species and groups of sites: indices and  
209 statistical inference. *Ecology* 2009; 90(12):3566–74.
- 210 15. Burns KN, Bokulich NA, Cantu D, Greenhut RF, Kluepfel DA, O'Geen AT et al. Vineyard soil  
211 bacterial diversity and composition revealed by 16S rRNA genes: Differentiation by vineyard  
212 management. *Soil Biology and Biochemistry* 2016; 103:337–48.

- 213 16. Trouvelot S, Bonneau L, Redecker D, van Tuinen D, Adrian M, Wipf D. Arbuscular mycorrhiza  
214 symbiosis in viticulture: a review. *Agron. Sustain. Dev.* 2015; 35(4):1449–67.
- 215 17. Zaller JG, Heigl F, Ruess L, Grabmaier A. Glyphosate herbicide affects belowground interactions  
216 between earthworms and symbiotic mycorrhizal fungi in a model ecosystem. *Sci Rep* 2014; 4:5634.
- 217 18. The University of Adelaide - School of Biological Sciences. *Sarocladium* | Mycology Online; 2021  
218 [cited 2021 Jan 29]. Available from: URL:  
219 <https://mycology.adelaide.edu.au/descriptions/hyphomycetes/sarocladium/>.
- 220
